# Supplementary material for: Beneficial Effect of Fingolimod in a Lafora Disease Mouse Model by Preventing Reactive Astrogliosis-Derived Neuroinflammation and Brain Infiltration of T-lymphocytes
Source: PubMed Central journal article supplement (PMC11087365; doi:10.1007/s12035-023-03766-1), 2023-11-16
Supplement: 12035_2023_3766_MOESM1_ESM.pdf [file 12035_2023_3766_MOESM1_ESM.pdf]

**Supplementary Material**

**Supplementary Fig. S1.** Fingolimod and dimethylfumarate did not affect the body weight of the mice during the treatment period. Average weight in grams (g) for female **(A)** or male **(B)** mice is represented as mean  $\pm$  standard deviation of the mean (SD) for each group of mice (WT in water, *Epm2b*<sup>-/-</sup> in water, fingolimod or dimethylfumarate) for each time point (weeks of treatment).

## Supplementary Figure S1

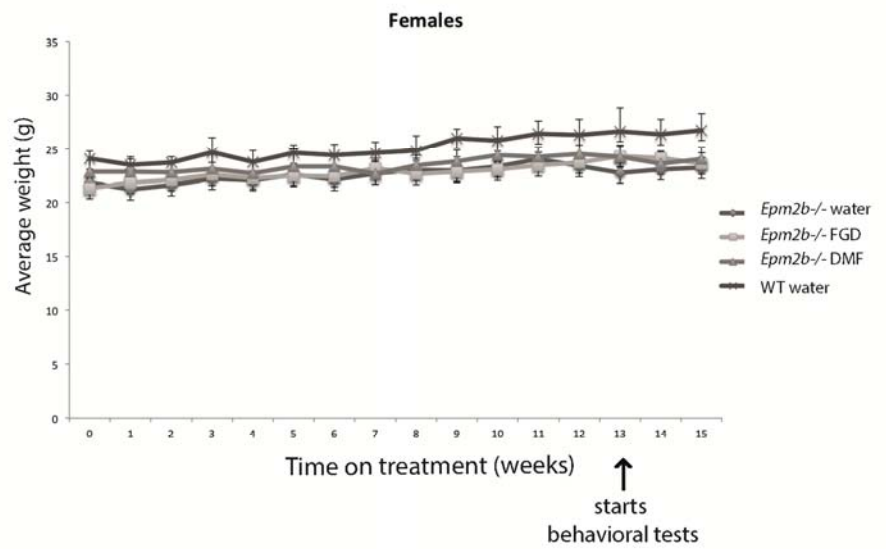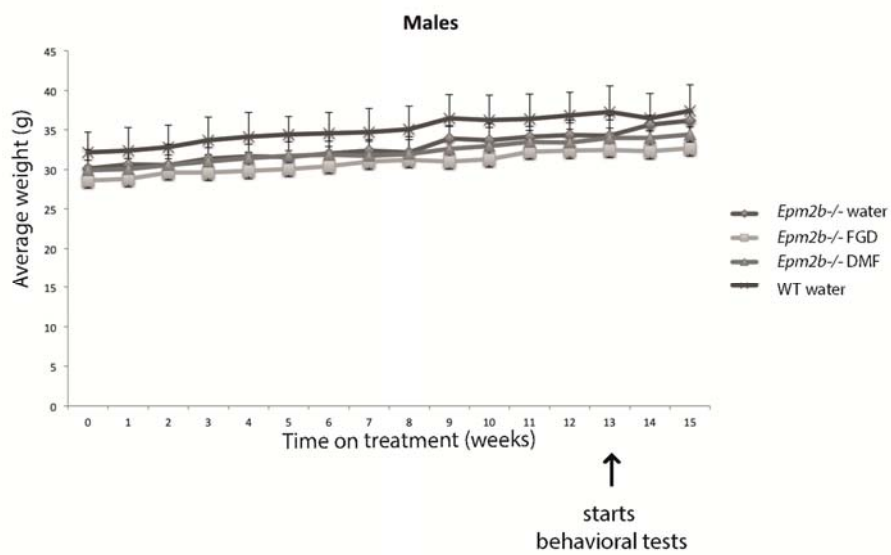

**Supplementary Table S1: Statistical summary table of behavioral and histopathological variables analyzed throughout this study.** The table details the behavioral test (analyzed by two-way ANOVA) or histological analysis (analyzed by one-way ANOVA) with the variable name and the mean  $\pm$  SD for each variable with the significance (P-value). (a) P-values of *Epm2b*<sup>-/-</sup> variables respect to the WT control, both in water; (b) P-values of variables from treated mice respect to the corresponding mice group treated with water. nd: not determined.

| Variable                                                          | Genotype             | Water <sup>a</sup>                 | Fingolimod              | P-value FGD <sup>b</sup> | Dimethyl Fumarate       | P-value DMF <sup>b</sup> |
|-------------------------------------------------------------------|----------------------|------------------------------------|-------------------------|--------------------------|-------------------------|--------------------------|
| Openfield<br>Traveled distance<br>in the peripheral<br>area (cm)  | WT                   | 1845.36 $\pm$<br>408.02            | 2275.25 $\pm$<br>324.34 | P=0.106                  | 1980.49 $\pm$<br>557.66 | P=0.970                  |
| Openfield<br>Traveled distance<br>in the peripheral<br>area (cm)  | Epm2b <sup>-/-</sup> | 2291.90 $\pm$<br>526.02<br>P=0.121 | 1821.76 $\pm$<br>200.99 | P=0.043                  | 2021.65 $\pm$<br>331.12 | P=0.553                  |
| Openfield<br>Travelled distance<br>in center (cm)                 | WT                   | 256.59 $\pm$<br>157.31             | 196.07 $\pm$<br>85.60   | P=0.731                  | 355.66 $\pm$<br>110.59  | P=0.227                  |
| Openfield<br>Travelled distance<br>in center<br>(cm)              | Epm2b <sup>-/-</sup> | 273.35 $\pm$<br>126.30<br>P=0.993  | 126.97 $\pm$<br>88.00   | P=0.015                  | 241.45 $\pm$<br>101.00  | P=0.980                  |
| Openfield<br>Number entries in<br>center                          | WT                   | 9.10 $\pm$ 4.91                    | 8.00 $\pm$ 3.43         | P=0.985                  | 11.87 $\pm$ 5.12        | P=0.574                  |
| Openfield<br>Number entries in<br>center                          | Epm2b <sup>-/-</sup> | 10.00 $\pm$ 5.23<br>P=0.996        | 5.18 $\pm$ 2.71         | P=0.049                  | 7.64 $\pm$ 3.25         | P=0.732                  |
| OLM<br>Discrimination<br>index                                    | WT                   | 5.76 $\pm$ 5.59                    | 34.21 $\pm$ 27.08       | P=0.946                  | 18.20 $\pm$ 31.04       | P=0.998                  |
| OLM<br>Discrimination<br>index                                    | Epm2b <sup>-/-</sup> | 19.77 $\pm$ 37.92<br>P=0.998       | 6.77 $\pm$ 20.13        | P=0.998                  | 1.57 $\pm$ 15.05        | P=0.999                  |
| OLM<br>Activity time (s)                                          | WT                   | 298.63 $\pm$ 13.68                 | 239.46 $\pm$ 52.18      | P<0.0001                 | 301.01 $\pm$ 6.43       | P=0.999                  |
| OLM<br>Activity time (s)                                          | Epm2b <sup>-/-</sup> | 297.31 $\pm$ 11.57<br>P=0.999      | 190.69 $\pm$ 48.69      | P<0.0001                 | 290.13 $\pm$ 15.58      | P=0.995                  |
| Neurodegenerative<br>signs<br>Hindlimb clasping<br>(Absent, Mild, | WT                   | 56, 25, 19, 0                      | 90, 5, 5, 0             | P<0.0001                 | 73, 20, 7, 0            | P<0.05                   |

|                                                                                   |          |                            |                |         |                |          |
|-----------------------------------------------------------------------------------|----------|----------------------------|----------------|---------|----------------|----------|
| Moderate, Severe)                                                                 |          |                            |                |         |                |          |
| Neurodegenerative signs<br>Hindlimb claspings<br>(Absent, Mild, Moderate, Severe) | Epm2b-/- | 56, 38, 6, 0<br>P<0.01     | 75, 25, 0, 0   | P<0.01  | 85, 15, 0, 0   | P<0.0001 |
| PGs inclusions<br>%PG numbers vs Epm2b-/- water                                   | WT       | 1.87 ± 1.14                | nd             | nd      | nd             | nd       |
| PGs inclusions<br>%PG numbers vs Epm2b-/- water                                   | Epm2b-/- | 100.00 ± 24.68<br>P<0.0001 | 126.36 ± 19.11 | P=0.093 | 109.20 ± 18.60 | P=0.387  |
| Astrogliosis<br>% GFAP intensity signal                                           | WT       | 100.00 ± 15.58             | nd             | nd      | nd             | nd       |
| Astrogliosis<br>% GFAP intensity signal                                           | Epm2b-/- | 156.92 ± 26.24<br>P<0.001  | 127.09 ± 10.90 | P<0.05  | 117.83 ± 13.38 | P<0.05   |
| Microgliosis<br>% IBA1 intensity signal                                           | WT       | 100.00 ± 24.75             | nd             | nd      | nd             | nd       |
| Microgliosis<br>% IBA1 intensity signal                                           | Epm2b-/- | 116.65 ± 27.59<br>P=0.247  | 111.91 ± 21.48 | P=0.900 | 101.65 ± 25.03 | P=0.532  |
| Relative gasdermin-D levels/Actin                                                 | WT       | 39.49 ± 2.30               | nd             | nd      | nd             | nd       |
| Relative gasdermin-D levels/Actin                                                 | Epm2b-/- | 80.03 ± 16.26<br>P<0.05    | 35.23 ± 17.95  | P<0.05  |                |          |
| Relative gasdermin-D levels/GAPDH                                                 | WT       | 40.40 ± 0.87               | nd             | nd      | nd             | nd       |
| Relative gasdermin-D levels/GAPDH                                                 | Epm2b-/- | 64.46 ± 29.48<br>P<0.05    |                |         | 78.54 ± 17.37  | P=0.199  |
| Relative P65/NFkB levels/Actin                                                    | WT       | 8.31 ± 6.26                | nd             | nd      | nd             | nd       |
| Relative P65/NFkB levels/Actin                                                    | Epm2b-/- | 16.96 ± 4.36<br>P=0.200    | 5.92 ± 3.63    | P<0.05  |                |          |
| Relative P65/NFkB levels/GAPDH                                                    | WT       | 0.96 ± 0.61                | nd             | nd      | nd             | nd       |
| Relative P65/NFkB levels/GAPDH                                                    | Epm2b-/- | 2.53 ± 0.39                |                |         | 1.22 ± 1.42    | P=0.700  |

|                                                                    |                      |                                                                                               |                                                 |                            |                                                 |                               |
|--------------------------------------------------------------------|----------------------|-----------------------------------------------------------------------------------------------|-------------------------------------------------|----------------------------|-------------------------------------------------|-------------------------------|
|                                                                    |                      | P=0.200                                                                                       |                                                 |                            |                                                 |                               |
| Relative SOCS3 levels/Actin                                        | WT                   | 42.14 ± 41.76                                                                                 | nd                                              | nd                         | nd                                              | nd                            |
| Relative SOCS3 levels/Actin                                        | Epm2b <sup>-/-</sup> | 75.61 ± 21.52                                                                                 | 21.57 ± 10.91                                   | P<0.05                     |                                                 |                               |
|                                                                    |                      | P=0.200                                                                                       |                                                 |                            |                                                 |                               |
| Relative SOCS3 levels/GAPDH                                        | WT                   | 0.83 ± 0.31                                                                                   | nd                                              | nd                         | nd                                              | nd                            |
| Relative SOCS3 levels/GAPDH                                        | Epm2b <sup>-/-</sup> | 1.16 ± 0.29                                                                                   |                                                 |                            | 1.17 ± 0.33                                     | P=0.900                       |
|                                                                    |                      | P=0.200                                                                                       |                                                 |                            |                                                 |                               |
| Relative CXCL10 expression                                         | WT                   | 1.19 ± 0.42                                                                                   | nd                                              | nd                         | nd                                              | nd                            |
| Relative CXCL10 expression                                         | Epm2b <sup>-/-</sup> | 11.06 ± 4.05                                                                                  | 6.11 ± 1.09                                     | P<0.05                     | 11.69 ± 9.35                                    | P=0.629                       |
|                                                                    |                      | P<0.01                                                                                        |                                                 |                            |                                                 |                               |
| T-Lymphocyte infiltration<br>Number of cells in 300µm <sup>2</sup> | WT                   | CD3 0.6 ± 0.8<br>CD4 0.1 ± 0.3<br>CD8 0.7 ± 1.0                                               | nd                                              | nd                         | nd                                              | nd                            |
| T-Lymphocyte infiltration<br>Number of cells in 300µm <sup>2</sup> | Epm2b <sup>-/-</sup> | CD3 5.0 ± 2.9<br>CD4 1.3 ± 1.0<br>CD8 4.3 ± 2.0<br><br>CD3 P<0.01<br>CD4 P<0.01<br>CD8 P<0.01 | CD3 2.3 ± 2.3<br>CD4 0.3 ± 0.5<br>CD8 1.5 ± 1.6 | P<0.05<br>P<0.01<br>P<0.05 | CD3 3.9 ± 2.7<br>CD4 0.6 ± 0.5<br>CD8 3.3 ± 1.2 | P=0.252<br>P=0.119<br>P=0.145 |
